# Supplementary material for: Hyperdispersed ruthenium nanoparticles anchored on S/N co-doped carbon nanotubes as an efficient HER electrocatalyst
Source: Royal Society of Chemistry journal article supplement (doi:10.1039/d2nj02869g), 2022-01-01
Supplement: d2nj02869g1.pdf [file d2nj02869g1.pdf]

*Supporting information*

**Hyperdispersed Ruthenium Nanoparticles Anchored on S/N  
Co-doped Carbon Nanotubes as an Efficient HER  
Electrocatalyst**

Hai-Lang Jia\*, Hong-Cheng Li, Jiao Zhao, Ming-Yun Guan

School of Chemical and Environmental Engineering, Institute of Advanced Functional Materials for Energy, Analysis and Testing Center of Jiangsu University of Technology, Jiangsu University of Technology, Changzhou 213001, P. R. China.

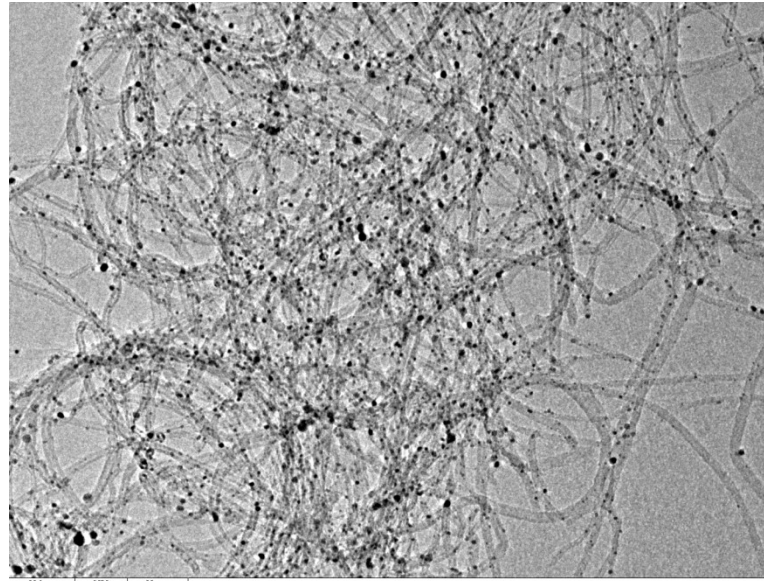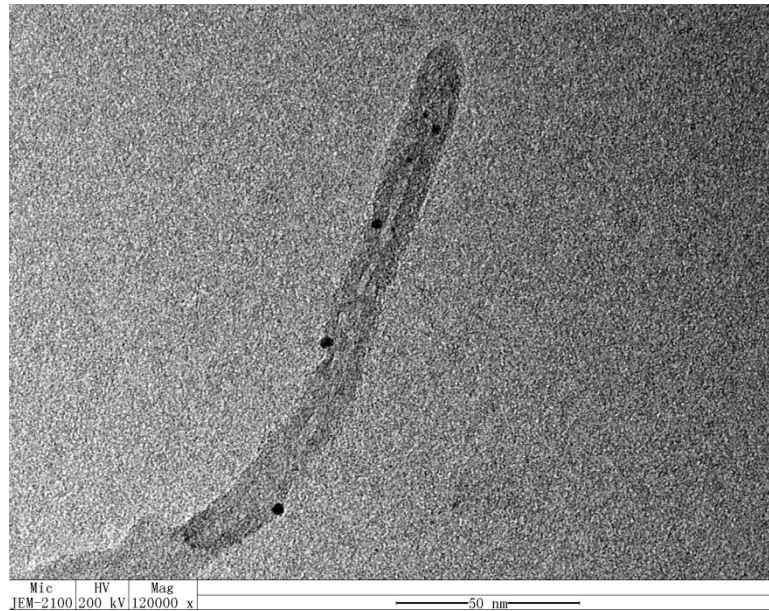

**Fig. S1** TEM of Ru@S/N/CNT

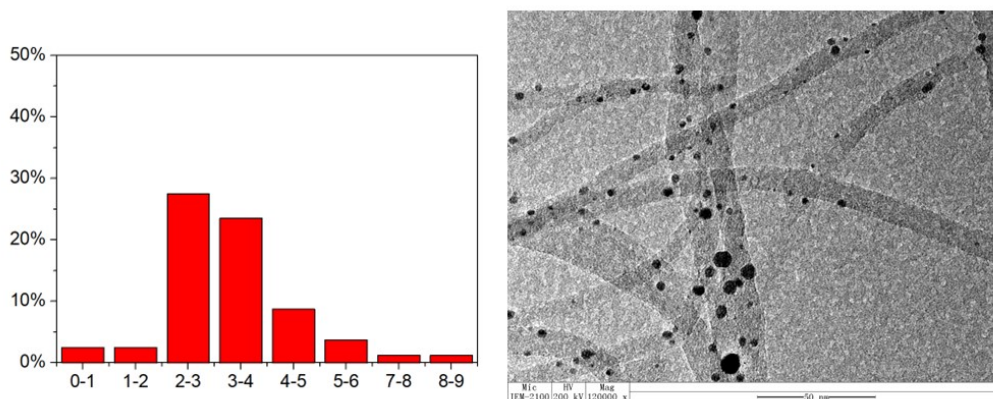

**Fig. S2** Particle size distribution of Ru@S/N/CNT

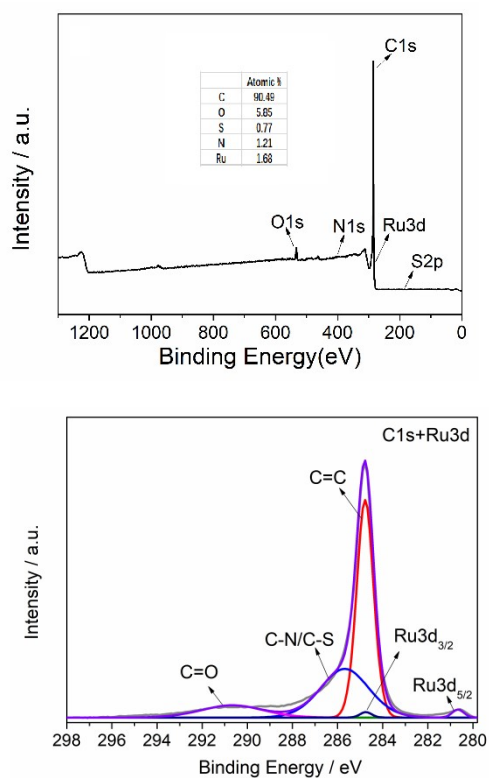

**Fig. S3** XPS survey spectra of Ru@S/N/CNT, high-resolution XPS spectra for C1s+Ru3d

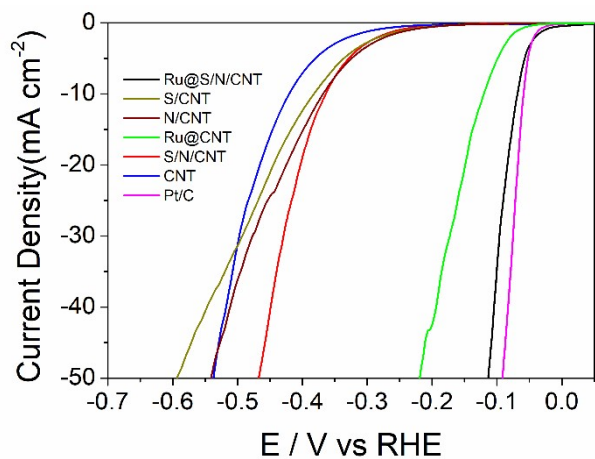

**Fig. S4** LSVs of Ru@S/N/CNT, S/CNT, N/CNT, Ru@CNT, S/N/CNT, CNT and Pt/C in 0.5 M H<sub>2</sub>SO<sub>4</sub>

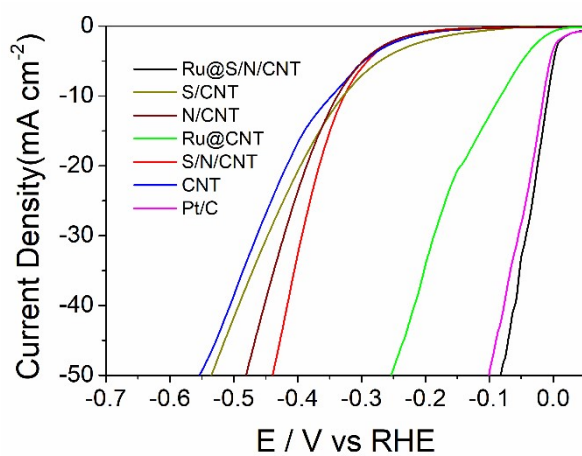

**Fig. S5** LSVs of Ru@S/N/CNT, S/CNT, N/CNT, Ru@CNT, S/N/CNT, CNT and Pt/C in 1 M KOH

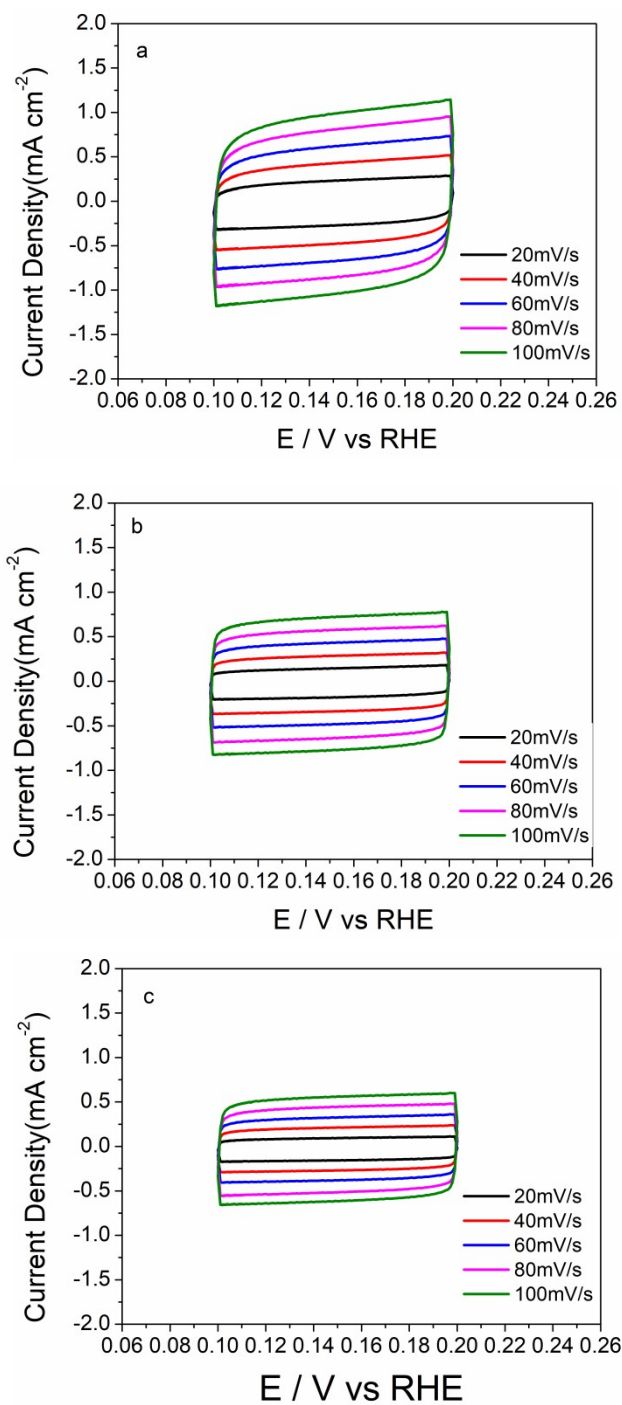

**Fig. S6** CV curves of Ru@S/N/CNT (a), S/N/CNT (b) and CNT (c) at different scan rates in 0.5 M H<sub>2</sub>SO<sub>4</sub> solution

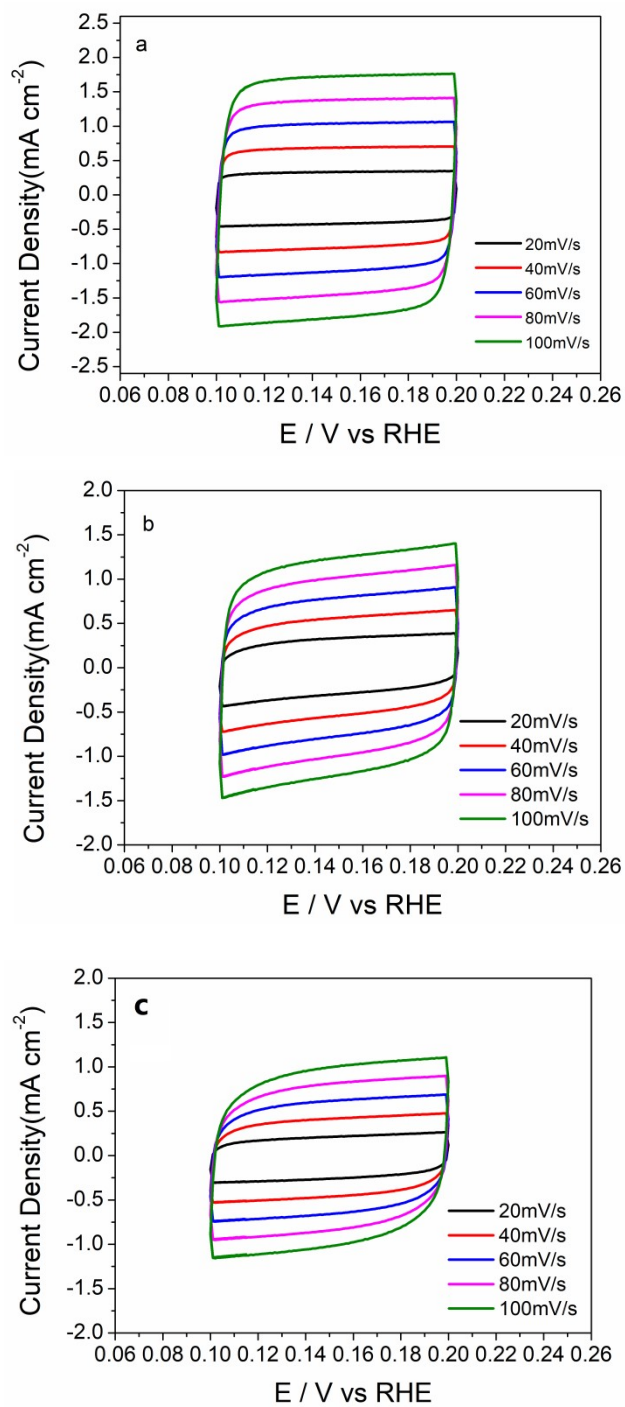

**Fig. S7** CV curves of Ru@S/N/CNT (a), S/N/CNT (b) and CNT (c) at different scan rates in 1 M KOH solution

**Table S1.** Summary of HER catalytic activities of Ru@S/N/CNT and some other catalysts reported in recent literatures (the potential is obtained at a current density of 10 mA cm<sup>-2</sup> for HER in 0.5 M H<sub>2</sub>SO<sub>4</sub>).

| Catalysts                                     | HER Overpotential @10 mA cm <sup>-2</sup> (mV) | Tafel Slope (mV dec <sup>-1</sup> ) | Ref.                                                 |
|-----------------------------------------------|------------------------------------------------|-------------------------------------|------------------------------------------------------|
| <b>Ru@S/N/CNT</b>                             | <b>68</b>                                      | <b>44</b>                           | <b>In this work</b>                                  |
| Pt <sub>0.095</sub> -Ru <sub>2</sub> P@Ru/CNT | 27                                             | 20                                  | ACS Sustainable Chem. Eng., 2021, 9, 44, 15063–15071 |
| Ru/GLC                                        | 35                                             | 46                                  | ACS Appl. Mater. Interfaces, 2016, 8, 35132.         |
| h-RuNP                                        | 29                                             | 33                                  | ACS Applied Nano Materials, 2021, 4, 8530.           |
| porous Ru                                     | 83                                             | 46                                  | Chem. Commun., 2017, 53, 11713.                      |
| Ru NPs                                        | 148                                            | 74                                  | J. Am. Chem. Soc., 2018, 140, 2731.                  |
| Ru@GnP                                        | 13                                             | 30                                  | Adv. Mater., 2018, 30, 1803676.                      |
| Rh–Rh <sub>2</sub> P@C                        | 24                                             | 36                                  | J. Mater. Chem. A, 2020, 8, 12378                    |
| hcp-Ru@NC                                     | 27.5                                           | 37                                  | ACS Catal., 2018, 8, 5714.                           |
| Ru/C                                          | 35                                             | 36.2                                | Appl. Catal. B: Environ., 2019, 258, 117952.         |
| Ru-CN/MC                                      | 43                                             | 61                                  | ChemElectroChem, 2019, 6, 2719.                      |
| RuNi/CQDs-600                                 | 58                                             | 55                                  | Angew. Chem., Int. Ed., 2019, 58, 2.                 |
| RuP <sub>2</sub> /CNT                         | 58                                             | 57                                  | Chem. Eur. J., 2019, 25,                             |

|                          |     |      |                                             |
|--------------------------|-----|------|---------------------------------------------|
|                          |     |      | 8579.                                       |
| Ru NP/PC                 | 63  | 83   | Small, 2019, 15, 1903057.                   |
| Ru/Ni <sub>2</sub> P@NPC | 89  | 62   | ACS Sustainable Chem. Eng., 2019, 7, 17714. |
| Ru/CoxP@NC               | 165 | 54.7 | ACS Sustainable Chem. Eng., 2019, 7, 9737.  |

**Table S2.** Summary of HER catalytic activities of Ru@N/S/TiO<sub>2</sub>/rGO and some other catalysts reported in recent literatures (the potential is obtained at a current density of 10 mA cm<sup>-2</sup> for HER in 1 M KOH).

| Catalysts                                             | HER Overpotential @10 mA cm <sup>-2</sup> (mV) | Tafel Slope (mV dec <sup>-1</sup> ) | Ref.                                                   |
|-------------------------------------------------------|------------------------------------------------|-------------------------------------|--------------------------------------------------------|
| <b>Ru@S/N/CNT</b>                                     | <b>9</b>                                       | <b>37</b>                           | <b>In this work</b>                                    |
| V <sub>s</sub> -Ru-Ni <sub>9</sub> S <sub>8</sub>     | 56                                             | 46.8                                | Applied Catalysis B: Environmental, 2022, 310, 121356. |
| Ru/B-Ni <sub>2</sub> P/Ni <sub>5</sub> P <sub>4</sub> | 34                                             | 57.5                                | J. Mater. Chem. A, 2022, DOI:10.1039/D2TA02685F        |
| Ru-CoP/NC                                             | 110                                            | /                                   | ACS Appl. Mater. Interfaces, 2021, 13, 47, 56035       |
| NiRu <sub>0.13</sub> -BDC                             | 34                                             | 32                                  | Nat. Commun., 2021, 12, 1369.                          |
| RuO <sub>2</sub> -TiO <sub>2</sub>                    | 150                                            | 95                                  | J. Am. Chem. Soc. 2018, 140, 17, 5719.                 |
| Ru-MoS <sub>2</sub> -Mo <sub>2</sub> C                | 25                                             | 58                                  | Nano Energy, 2021, 88, 106277.                         |
| H-B/Ru-FeP                                            | 216                                            | /                                   | ACS Appl. Energy Mater., 2020, 3, 1082.                |
| Ru/C-Ti <sub>3</sub> C <sub>2</sub> Tx/NF             | 37                                             | 60                                  | Chem. Eng. J., 2021, 426, 131234.                      |
| Ru-MnFeP/NF                                           | 35                                             | 36                                  | Adv. Energy Mater., 2020, 10, 2000814.                 |



|                                    |     |    |                                                        |
|------------------------------------|-----|----|--------------------------------------------------------|
| Ru-NiFe-P                          | 44  | 80 | Applied Catalysis B: Environmental, 2020, 263, 118324. |
| Ru@NiCo-MOF HPNs                   | 284 | /  | Inorg. Chem., 2021, 60, 5882.                          |
| RuCo@NC                            | 280 | /  | Green Chem., 2020, 22, 7884.                           |
| RuCo@C-350                         | 91  | 83 | CrystEngComm, 2022, DOI:10.1039/D2CE00528J             |
| Ni <sub>5</sub> P <sub>4</sub> -Ru | 54  | 52 | Adv. Mater., 2020, 32, 1906972.                        |
| Ru-Co <sub>2</sub> P/N-C/NF        | 65  | 65 | Chem. Eng. J., 2021, 408, 127308.                      |
